# Supplementary material for: Improvements to stratospheric chemistry scheme in the UM-UKCA (v10.7) model: solar cycle and heterogeneous reactions
Source: Copernicus journal article supplement (doi:10.5194/gmd-2018-279), 2018-11-21
Supplement: Supplementary file [file gmd-2018-279-AC1-supplement.pdf]

## Reviewer #1

### \* General comments

- It is difficult to understand why the photolysis and heterogeneous chemistry simulations have different set-ups. In the case of heterogeneous chemistry simulations: l9 p8: 'In order to examine only the direct effect of the modifications, feedbacks between the chemistry (ozone, methane, nitrous oxide and water vapour) and radiation have been switched off for these runs (i.e. these runs are identical in terms of their meteorological variables).' That is a very good set-up to check the effects of changes in the chemistry scheme without dynamical feedbacks. Then the authors do additional runs with fully coupled chemistry-dynamics (i.e. model-calculated fields of ozone, methane, nitrous oxide and water vapour used in the radiation scheme) to see the full effects on ozone. That is a very sensible approach. In contrast, in the photolysis simulation, only short (only 15 years for 11-years solar cycles) fully coupled simulations are run. As a result, the analysis and interpretation are difficult because of the dynamical variability (differences in temperatures and winds between the 2 runs). The authors are well aware of these limitations: l1, p5: 'We only plot the results for the 60S–60N region here because the variability in ozone is quite large in the polar regions, masking the impact of solar variability.' or l14, p5: 'Figure 2 suggests there may be some phase shift between the solar cycle and its effect on stratospheric ozone. Although, the model runs presented here are too short to verify'. The authors cannot conclude with this model set-up. I would suggest to run 2 additional simulations without the dynamical feedbacks (i. 'runs are identical in terms of their meteorological variables'). It means using up computing resources but the runs are short (15 years) and this would really help the analysis.

*We now use two new 20-year runs with chemistry-radiation feedbacks turned off. Figure 2 now shows a global average TCO rather than 60N-60S average as high latitude variability is no longer a factor. These runs show a very strong correlation between the solar cycle and ozone. The paragraph on l9-15 p6 modified to reflect that the new runs no longer show the phase shift between the solar cycle and ozone.*

- The heterogeneous chemistry part contains a nice latitude and altitude-resolved analysis. I don't know why the photolysis part is so short with no latitude or altitude-resolved analysis. Again, I would suggest to follow not only the heterogeneous chemistry set-up but also the structure of the analysis. I am sure that readers would be interested by seeing the 11-year solar cycle signal in the global zonal mean ozone distribution.

*Now that I am using the no-feedback runs there is very little latitudinal variation. I have added a new Figure 3 which shows the variation with altitude. A paragraph (p5 in 5-15) has been added to describe this figure.*

- I would suggest to move subsections 3.1 and 4.1 into the very short section 2 which is devoted to model description. sections 3 and 4 should focus on presenting and discussing the results. This would facilitate the flow of the reading.

*To me it makes more sense to have these sections separate. For example, it is more convenient having Table 1 and a description of the model runs immediately before the results as it serves as somewhat of an introduction to the section and saves the reader going all the way back to section 2 for a reminder of what the model changes were.*

### \* Specific comments

l7, p2: Not correct. Solar radiation also varies on solar rotational timescales (about 27 days) with amplitude just slightly lower than the 11-year cycles. It also varies on longer time-scales.

*L7, p2 Changed to: "One of the main modes of variation in solar radiation is the 11-year cycle..."*

l10, p2: not only early 2000s. Chipperfield et al, Nature, 2017 study (along with the supplementary information) pointed out the effects of the 11-year solar variability (not only about the early 2000s but also about the mid-2010s) on ozone trends.

*L12, p2 Added: "More recent increases in ozone have been shown to be above those expected by the next solar maximum and are therefore indicative of the effect of declining stratospheric chlorine [Keeble et al. 2018, Chipperfield et al. 2017]."*

l19, p2: constellations? configurations

*l20, p2: Changed to configurations*

l14, p3: "...using a combination of the FAST-JX scheme (Wild et al., 2000; Bian and Prather, 2002; Neu et al., 2007) and look-up tables." In terms of computing costs, it does not seem to be very efficient to combine a look-up table and an on-line photolysis model. Why not use either a look up table or Fast-J?

*The look-up table is necessary in the upper levels of the model where the shorter wavelengths are important. The way the model is set-up FAST-JX runs at all levels, so the option is either to add on the contribution from FAST-JX at the upper levels or not i.e. there is no computational benefit from only using the look-up table at these levels.*

Figure 2, p5: solar variability does not simply impact the ozone production (molecular oxygen photolysis), it also impact ozone destruction via the change in Ox partitioning (notably the photolysis of O<sub>3</sub> to atomic oxygen which is a key reactant in the ozone destroying catalytic cycles. I would suggest to show also the O<sub>3</sub>-to-O photolysis.

*Changes in O<sub>3</sub> loss are now shown in Figure 3. Pg 5 In 5-15 have been added which describe the figure and note the impact of the solar cycle on the ozone photolysis rate.*

Figure 2 caption: 'the flux of the oxygen photolysis'. Do you mean the solar flux below 240 nm, the solar flux below 240 nm weighted by the O<sub>2</sub> cross sections, or O<sub>2</sub> photolysis rate ?

*Changed to "chemical flux"*

l18-20, p6: 'It may be possible to extend our treatment of solar variability to the UM radiation scheme although it is unlikely to have a large effect given the smaller amplitude of the solar cycle at the relevant wavelengths.' for the temperature, it is not at all small Swartz et al., ACP, 2012. I know that the direct heating continuation to ozone changes is much smaller but not negligible. It is better to provide a reference for this statement.

*I was basing this on Bednarz et al. 2018 which is mentioned in the following sentence. Changed that sentence to "Specifically, Bednarz et al. [2018] find that the difference between solar maximum and minimum in the shortest UM wavelength band (covering 200-320 nm) is only 0.56%, ..." to make the connection clearer.*

l14, p8: it is expected. remove 'as'.

*L5, p9: Removed 'as'*

l19, p9: no need to be so cautious. Figure 6 (nice way to compare CCM with T biases and observations) proves it. It clearly demonstrates that, at least over the 210-215 K interval the new model performs

much better in terms of Antarctic ozone October climatology. An hypothetical correction of T biases would be equivalent to running a nudged version of the model and surely getting better results with the new version.

*L6, p10: Removed "it is likely that a hypothetical"*

L2, p11 and so on: I suggest to add chemical when talking about flux in order to avoid confusion with other fluxes (e.g. dynamical).

*L10, p10: Changed to "chemical flux"*

Figure 8 caption: is it global mean?

*No. Caption changed to: "Annual difference in ozone production (red) / destruction (blue) flux between "New Het." and control runs, in the lower stratosphere (12--24 km) south of 65S 1996--2009."*

L4-5, p13: unclear to me. The bromine heterogeneous reactions convert BrONO<sub>2</sub>, HBr and HOBr into bromine radicals (Br and hence BrO). Why does BrO decrease and HBr increases?

*I suspect this may be due to interaction between the Cl and Br chemistry. As BrONO<sub>2</sub> loss is occurs mostly on sulphate aerosol in is quite widespread. However, the changes to HBr and BrO are localized to the SH high latitudes. I did not output the reaction fluxes necessary to fully investigate this (and a full investigate would likely be outside the scope of this paper).*

L9-10, p13: Figure 5 shows the opposite. I think that the most likely explanation is that less O<sub>3</sub> means less heating and hence longer lasting vortex. It is a classic example of an ozone bias resulting in a temperature bias.

*L3, p14: Removed the sentence "However, the model runs presented here show no evidence of this effect, with the ozone replenishing at similar rates in either configuration."*

L11-13, p13: I suppose that this statement is not just a guess. A reference for it?

*These are just a couple of possibilities that I am suggesting.*

Reviewer #2

\* General comments

- I support the criticism of Referee #1 concerning the statistical significance of the solar cycle simulation. A closer look at figure 2 reveals, that up to the year 2000 ozone anomalies closely follow the solar coefficient. This signal is lost after 2000, where it could be interpreted as noise around the zero line. The author's provide no statistical evidence (and I think they can not) to convince the reader, that the model is able to show the impact of the solar cycle on total column ozone (TCO). What to do? Either extend the simulation, as suggested by referee #1, and hope that the signal on TCO can then be certainly identified, or use a different indicator. TCO might not be the best indicator for the impact of the solar cycle on stratospheric ozone. The signal is rather small. For instance a time series which does not only look at TCO, but considers the vertical distribution of stratospheric ozone could save the day. Also to discriminate between hemispheres or tropics and mid latitudes might help. There could be compensating effects (chemical or dynamical ones), which lead to the noisy signal in TCO. All in all, I strongly suggest a more sound statistical analysis of the impact of the solar cycle on stratospheric ozone.

*See response to Reviewer 1*

\* Specific comments, additional comments on topics, which have not been covered by Referee #1:

- l20-30, p2: A GMD paper does not need to provide a complete extensive overview on the field. But at least the fact that some chemistry-climate models have included the heterogeneous stratospheric bromine reactions for a long time should be mentioned, e.g. see supplement of Jöckel et. al. ACP, 2006 and others.

*L33, p2 Added: "Various heterogeneous bromine reactions have been included in other chemistry-climate models [e.g. Jockel et al. 2006, Wegner et al. 2013]."*

# Improvements to stratospheric chemistry scheme in the UM-UKCA (v10.7) model: solar cycle and heterogeneous reactions

Fraser Dennison<sup>1</sup>, James Keeble<sup>2,3</sup>, Olaf Morgenstern<sup>1</sup>, Guang Zeng<sup>1</sup>, N. Luke Abraham<sup>2,3</sup>, and Xin Yang<sup>4</sup>

<sup>1</sup>National Institute of Water and Atmospheric Research, Wellington, New Zealand

<sup>2</sup>Centre for Atmospheric Science, Department of Chemistry, University of Cambridge, Cambridge, UK

<sup>3</sup>National Centre for Atmospheric Science, UK

<sup>4</sup>British Antarctic Survey, Cambridge, UK

**Correspondence:** Fraser Dennison (fraser.dennison@niwa.co.nz)

## Abstract.

Improvements are made to two areas of the United Kingdom Chemistry and Aerosol (UKCA) module, which forms part of the Met Office Unified Model (UM) used for weather and climate applications. Firstly, a solar cycle is added to the photolysis scheme. The effect on total column ozone of this addition was found to be around 1–2% in mid-latitude and equatorial regions in phase with the solar cycle. Secondly, reactions occurring on the surfaces of polar stratospheric clouds and sulfate aerosol are updated and extended by modification of the uptake coefficients of five existing reactions and the addition of a further eight reactions involving bromine species. These modifications are shown to reduce the overabundance of modeled total-column ozone in the Arctic during October to February, southern mid-latitudes during August, and the Antarctic during September. Antarctic springtime ozone depletion is shown to be enhanced by 25 DU on average, which now causes the ozone hole to be somewhat too deep compared to observations. We show that this is in part due to a cold bias of the Antarctic polar vortex in the model.

## 1 Introduction

Stratospheric chemistry is a crucial aspect of chemistry–climate models primarily due to the coupling of ozone with atmospheric dynamics. Ozone strongly absorbs ultraviolet (UV) radiation, thus controlling the temperature of the stratosphere and hence the speed and structure of large scale stratospheric circulation (e.g. McLandress et al., 2010; Braesicke et al., 2013; Keeble et al., 2014). Ozone depletion in southern high latitudes has been shown to drive trends in the Southern Annular Mode (SAM) which is the leading mode of climate variability in the Southern Hemisphere (SH) (e.g., McLandress et al., 2011; Thompson et al., 2011; Dennison et al., 2015). In turn the SAM affects numerous other climate features, e.g. Antarctic surface temperatures (Thompson and Solomon, 2002; Marshall, 2007; Gillett et al., 2006), the Southern Ocean storm track (Yin, 2005), the atmospheric blocking frequency (Dennison et al., 2016), and sea ice (Hall and Visbeck, 2002; Sen Gupta and England, 2006). In northern high latitudes, chemical ozone loss is less pronounced (e.g. Solomon et al., 2014), although there

is some evidence of the effect of strong ozone depletion events on the large-scale circulation, with impacts on mid-latitude weather (e.g. Shindell et al., 2001; Ivy et al., 2017).

The abundance of ozone is affected by solar radiation via photochemical reactions. The dominant mode of ozone production is via the photolysis of oxygen; ozone destruction is also initiated by photolysis. Ozone-depleting reactions involving only oxygen compounds are known as the Chapman cycle (Chapman, 1930). Additionally, there are photolysis reactions which are part of various ozone depleting catalytic cycles, for example the photolysis of chlorine peroxide ( $\text{Cl}_2\text{O}_2$ ) (Crutzen, 1974; Molina and Rowland, 1974; McGrath et al., 1990). One of the main modes of variation in solar radiation is the 11-year cycle (Solanki et al., 2013, and references therein). This cycle is known to have a significant effect on stratospheric ozone (e.g. Zerefos et al., 1997; Calisesi and Matthes, 2006; Tourpali et al., 2007; Kuroda et al., 2008; Gruzdev, 2014). Specifically, studies such as Dameris et al. (2006), Steinbrecht et al. (2004), and Keeble et al. (2018) make the point that ozone increases in the early 2000s were caused by the Sun going through its solar maximum and did not constitute evidence of ozone recovery due to reductions in stratospheric halogen. More recent increases in ozone have been shown to be above those expected by the next solar maximum and are therefore indicative of the effect of declining stratospheric chlorine (Keeble et al., 2018; Chipperfield et al., 2017).

The importance of simulating the solar cycle in chemistry-climate models (CCMs) has been noted by a number of studies (e.g. Egorova et al., 2005; Langematz et al., 2005; Tourpali et al., 2003; Labitzke et al., 2002). Of the 20 CCMs participating in the first phase of the Chemistry-Climate Model Initiative (CCMI-1), only three did not consider solar variability (Morgenstern et al., 2017). In this paper we describe the addition of a solar cycle to the photolysis scheme in a newer version of that model and show the impact this has on modeled stratospheric ozone. In the following we will refer to the model as “UM-UKCA” (Unified Model - United Kingdom Chemistry and Aerosols) which forms part of the United Kingdom Earth System Model (UKESM) and other configurations of the Met Office Unified Model (UM).

In addition to photolysis reactions, heterogeneous reactions are also important for stratospheric ozone. Halogen species such as hydrogen chloride ( $\text{HCl}$ ), chlorine nitrate ( $\text{ClONO}_2$ ), hydrogen bromide ( $\text{HBr}$ ), and bromine nitrate ( $\text{BrONO}_2$ ) react on the surfaces of stratospheric aerosols, e.g. polar stratospheric clouds (PSCs), forming species which are subsequently photolysed into ozone depleting radicals. In this study, two configurations of UKCA are used which differ in the representation of stratospheric chemistry. In previous versions of the UKCA chemistry scheme, only five heterogeneous reactions are considered (Morgenstern et al., 2009), none of which involve the activation of bromine. While bromine is much less abundant than chlorine in the stratosphere, on a per-atom basis it is more effective at depleting ozone (Daniel et al., 2007; Newman et al., 2007; Sinnhuber et al., 2009). As such, it has been shown to have a significant effect in some instances. For example, Sinnhuber et al. (2009) have estimated that approximately half of northern mid-latitudes ozone loss over the period 1980-2005 may be attributable to anthropogenic bromine emissions. To account for this, in order to improve the simulation of stratospheric ozone in the UKCA model, eight further heterogeneous reactions involving bromine species are added. In addition, rate constants for the heterogeneous reactions are updated to match latest literature values. Various heterogeneous bromine reactions have been included in other chemistry-climate models (e.g. Jöckel et al., 2006; Wegner et al., 2013).

This study details the effects on simulated stratospheric ozone of adding solar variability to the UKCA photolysis scheme, and of expanding heterogeneous chemistry to include reactions involving bromine compounds. These two additions will be examined separately. Section 2 gives a brief description of the UM-UKCA model. Section 3 deals with the photolysis and Section 4 deals with the heterogeneous chemistry. Each section details the changes made to the model, the experiments run to test the impact of these changes, the effect of the changes on the stratospheric ozone and discussion of the results. Section 5 provides a summary.

## 2 Model Description

The United Kingdom Chemistry and Aerosol (UKCA) module is part of the Met Office Unified Model (UM). Here we use a configuration with a free running atmosphere and prescribed sea ice and sea surface temperatures from the HadISST dataset (Rayner et al., 2003) and operate the model at a resolution of  $1.875^\circ$  longitude by  $1.25^\circ$  latitude with 85 levels extending to 85 km. The UKCA model contains a number of chemistry configurations; here we use the combined stratosphere and troposphere chemistry (CheST) option (a combination of Morgenstern et al. (2009) and O'Connor et al. (2014)) in a GA7.1 (Walters et al., 2017) atmosphere configuration identical to that used in Esentürk et al. (2018) but at Unified Model version 10.7. This configuration includes 75 chemical species and 283 reactions. Further details on the relevant model chemistry are provided in Sections 3 and 4.

## 3 Photolysis and the Solar Cycle

### 3.1 Model

Photolysis rates in the configuration of the UKCA model used here are calculated using a combination of the FAST-JX scheme (Wild et al., 2000; Bian and Prather, 2002; Neu et al., 2007) and look-up tables. FAST-JX covers wavelengths from 177 to 850 nm over 18 wavelength bins, thus making it suitable for the simulation of chemistry in the stratosphere. FAST-JX calculates scattering for all wavelength bands. The implementation of FAST-JX in UKCA is described by Telford et al. (2012). Above about 60 km, wavelengths shorter than 177 nm become important. In this region, UKCA additionally uses a look-up table of photolysis rates (Lary and Pyle, 1991; Morgenstern et al., 2009) for the contribution to photolysis occurring at these wavelengths. Rates from the two schemes are added together to form the full photolysis rate.

The implementation of the solar cycle in the model uses solar irradiance data from Lean et al. (2005). Using a singular-value decomposition analysis, solar irradiance  $I$  ( $\text{Wm}^{-2}$ , which comes as a function of time and wavelength) is expressed as

$$I(\lambda, t) = I_0(\lambda) + I_1(\lambda)T(t) \quad (1)$$

i.e. a constant term  $I_0$  (the temporal average over the time series) and the product of a spectrally varying term  $I_1$  and a time series  $T$  at monthly resolution.  $I_1$  and  $T$  are then normalized such that the standard deviation of  $T$  equals 1 and  $I_1$  is predominantly positive. These terms are illustrated in Figure 1. The decomposition captures the full variability in the Lean

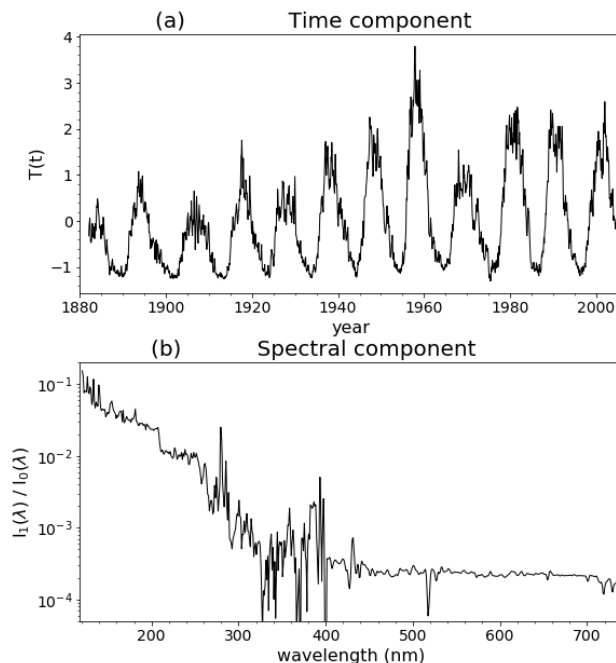

**Figure 1.** Singular value decomposition of the solar irradiance data into the (a) time series and (b) spectral components.

et al. (2005) data extremely well. The spectral term  $I_1$  is processed by the FAST-JX binning algorithm into an 18 element array (Bian and Prather, 2002) and for the lookup table part of photolysis it is processed into a 46-element array covering the wavelength range of 116.7 to 176.2 nm (the Lean et al. (2005) data cover wavelengths of 120 nm and above, so the first five elements are zero). The top-of-the-atmosphere incoming shortwave flux is then modified by these time series and wavelength

5 factors. The time series is extended into the future by repeating an average of the last five solar cycles.

To test this modification, two 20-year runs were produced: one with the solar cycle switched on and a control run with the solar cycle switched off. In order to examine only the direct effect of the modification, feedbacks between the chemistry (ozone, methane, nitrous oxide and water vapour) and radiation have been switched off for these runs (i.e. these runs are identical in terms of their meteorological variables). These runs use historic GHG and ODS forcing. The effect of the solar cycle was tested

10 by comparing the oxygen photolysis rates in the two runs. This reaction is a component of the cycle which is the main mode of ozone production in the stratosphere and requires radiation with wavelengths shorter than 240 nm (Chapman, 1930). Figure 1 shows that at these wavelengths the solar irradiance will vary with an amplitude of up to 10% for a 1-standard deviation anomaly of solar output  $I$ , so we expect an effect on the oxygen loss rate of a similar magnitude.

### 3.2 Results

15 Figure 2(a) shows the anomalous globally averaged oxygen loss rate in the solar cycle run relative to the control run. The 11-year cycle is clearly evident with the amplitude of approximately  $\pm 10\%$  in the mesosphere. This magnitude is what is



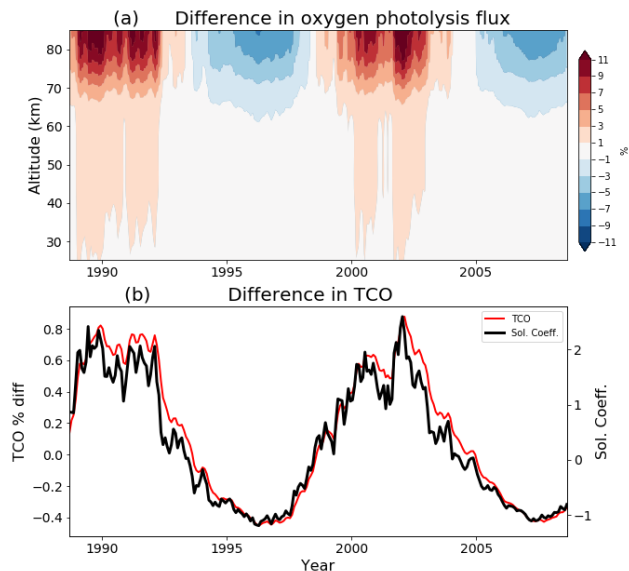

**Figure 2.** (a) The global mean anomaly in the chemical flux of the oxygen photolysis reaction and (b) the mean total column ozone anomaly  $60^{\circ}\text{S}$ – $60^{\circ}\text{N}$  (cyan, and 3-year running mean in blue), both expressed as percentage difference between the control and solar cycle runs. Overlaid on (b) is the solar coefficient time series,  $T$  (black).

expected given the spectral component shown in Figure 1 is of the order of 10% for the shorter wavelengths at which this reaction occurs. The amplitude of the anomaly decreases in the stratosphere as this short-wavelength radiation gets attenuated.

The effect of the solar cycle implementation on ozone is shown in Figure 2(b). The percentage difference in the global mean total column ozone (TCO) in the solar cycle run relative to the control run is indicated by the red curve. It can be seen that ozone varies in phase with the solar cycle, illustrated here by the black curve (taken from Figure 1(a)), with an amplitude of around 1% or 2–3 Dobson Units (DU).

In addition to ozone production via oxygen photolysis, variations in solar flux also affect ozone loss pathways. These include the photolysis of ozone, a component of the Chapman cycle, and various catalytic loss cycles. We illustrate the effect of the solar cycle in Figure 3(a) which shows the difference in mean chemical fluxes of the ozone production (blue) and various loss pathways as functions of altitude for the year 1989 (i.e. near a solar maximum). The figure also shows the net effect from the changes in the production and loss (black curve). The photolysis of ozone extends to longer wavelengths than that of oxygen (Chapman, 1930) and hence is less influenced by the solar cycle than the photolysis of oxygen (at solar maximum the photolysis rate of ozone increases by around 1%). However, the various changes in the fluxes of the catalytic loss cycles offset the increase in production to a large extent. While the effect on ozone production peaks around 44 km, Figure 3(b) shows that the impact on the ozone mixing ratio peaks at a somewhat lower altitude, around 39 km. This is due, in large part, to the  $\text{HO}_2$  loss cycle that increases strongly above 40 km. The effect on the ClO cycle and the loss branch of the Chapman cycle (i.e. the  $\text{O}_3 + \text{O}^{3\text{P}}$  reaction) also peak slightly above 40 km.

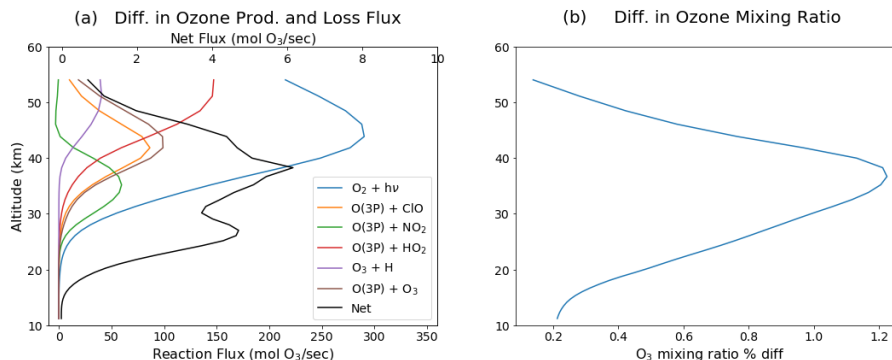

**Figure 3.** Difference in the (a) chemical flux of the ozone production and loss reactions and (b) global mean ozone mixing ratio between the control and solar cycle runs for 1989

### 3.3 Discussion

The magnitude of the solar cycle driven ozone effect shown here i.e., 1–2% between solar maximum and solar minimum, compares well to other observational and climate model studies. A review of a number of observational studies by Calisesi and Matthes (2006) found a magnitude around 2% for stratospheric ozone. Reinsel et al. (2002), using total column ozone data from the Total Ozone Mapping Spectrometer (TOMS) satellite instruments, found the effect to be 1-2%. More recently, Maycock et al. (2016) found the effect in the lower stratosphere to be around 1% using the Stratospheric Aerosol and Gas Experiment (SAGE) and Solar Backscatter Ultraviolet Merged Ozone Dataset (SBUVMOD) observations. Maycock et al. (2017) examine a number of CCM1 models and found them to be largely consistent with these observational findings.

Figure 2 shows the the variation in ozone to be strongly in phase with the solar cycle. Previous work has found there to be phase shift between the solar cycle and its effect on ozone. For example, Gruzdev (2014) found that in the middle and lower stratosphere the oscillation of ozone leads the solar cycle while, in the upper stratosphere it lags the solar cycle, with the difference being as much as a quarter cycle. It is proposed that these results follow from the variation in the strength of the Brewer-Dobson circulation with the solar cycle (Kodera, 2006). Angell (1989) also found that ozone leads the solar cycle but with a much smaller phase difference of around half a year. Because the model runs used here have chemistry-radiation feedback switched off we would not expect to see this effect.

Bednarz et al. (2018) also examine an implementation of a solar cycle in the UKCA model. They take a slightly different approach wherein the amplitude of the solar cycle is defined by the difference between the 1981 solar maximum and the 1986 solar minimum. Observational data are used to partition this variation across the 18 FAST-JX wavelength bins as well as the UM shortwave radiation scheme's six bins. No spectral variation in the solar irradiance is accounted for in the look-up table. The results presented here are broadly similar to those shown by Bednarz et al. (2018); they report a solar driven effect on total column ozone in the 60°s - 60°N region of 4.1 ( $\pm 1.9$ ) and 5.6 ( $\pm 1.4$ ) DU/Wm<sup>-2</sup> using two different methods, where the difference in total irradiance between solar maximum and minimum was 1.06Wm<sup>-2</sup>. The difference between solar maximum

and minimum shown in Figure 2 expressed as an absolute difference is around 4 – 5 DU. Bednarz et al. (2018) also find the ozone response to increase away from the equator but do not report values for the polar regions.

The approach we have taken here has the advantage of using historical solar data. Figure 1(a) shows that the amplitude of the cycle is not constant over the historical record, and as such historical simulations should be more accurate than if using a cycle of constant amplitude. Also, our more comprehensive treatment of the look-up table component, which is used here for pressure levels above 20 Pa, is likely to produce better results in the upper model levels, for example, in the photolysis of oxygen shown in Figure 2(a). Our solar cycle implementation is solely in the UKCA module, unlike Bednarz et al. (2018) who also implemented solar variability in the UM shortwave radiation scheme (which is separate from the photolysis scheme). It may be possible to extend our treatment of solar variability to the UM radiation scheme although it is unlikely to have a large effect given the smaller amplitude of the solar cycle at the relevant wavelengths. Specifically, Bednarz et al. (2018) find that the difference between solar maximum and minimum in the shortest UM wavelength band (covering 200-320 nm) is only 0.56%, and is less than 0.1% in the longer-wavelength bands.

## 4 Heterogeneous Chemistry

### 4.1 Model

The pre-existing UKCA stratospheric scheme included five heterogeneous reactions, the first five listed in Table 1. Reaction rates are calculated based on uptake on three classes of aerosols: ice, nitric acid trihydrate (NAT), and sulphate aerosol (SA). Ice is taken from the UM microphysics scheme (Wilson and Ballard, 1999), i.e. it is consistent with cloud physics used elsewhere in the model, the calculation of NAT abundances follows Hanson and Mauersberger (1988), and a climatology of sulphate aerosol based on year 2000 is prescribed (Morgenstern et al., 2010). Table 1 lists the uptake coefficient on each aerosol type for each reaction; the uptake coefficient is the probability of the gas molecule undergoing an irreversible reaction upon collision with the specified surface. Uptake coefficients for these reactions are those recommended by the Jet Propulsion Laboratory (JPL) (Burkholder et al., 2015), in many cases this represents a change from the coefficients in pre-existing scheme (which are listed under “Old” in Table 1).

We extend the heterogeneous chemistry scheme by adding eight reactions involving bromine species, these are also listed in Table 1. The uptake coefficients for the additional reactions follow International Union of Pure and Applied Chemistry (IUPAC) (Crowley et al., 2010) recommendations except for the  $\text{BrONO}_2 + \text{HCl}$  reaction on SA surfaces which follows Burkholder et al. (2015).

The changes to the heterogeneous chemistry are initially tested in separate parts to assess their relative importance, namely the updating of the NAT and ice uptake coefficients for the original five reactions (labeled “New Coeff.”), the new formulation for the uptake coefficients on sulfate aerosol (“Shi 2001”) and the addition of the eight new bromine reactions (“New Br”), as well as these modifications in combination (“All”). 15-month simulations are produced for each and compared to a control simulation with the original heterogeneous chemistry. Similar to the solar cycle runs, chemistry–radiation feedbacks are switched off for these runs in order to examine only the direct effect of the modifications.

**Table 1.** Heterogeneous reactions included in the updated UKCA module and the uptake coefficients on ice, NAT and SA.

| Reaction                                                                               | Uptake Coefficient |                   |        |                     |       |                  |
|----------------------------------------------------------------------------------------|--------------------|-------------------|--------|---------------------|-------|------------------|
|                                                                                        | Ice                |                   | NAT    |                     | SA    |                  |
|                                                                                        | Old                | New               | Old    | New                 | Old   | New              |
| $\text{ClONO}_2 + \text{HCl} \rightarrow 2 \text{Cl} + \text{HNO}_3$                   | 0.3                | 0.3 <sup>1</sup>  | 0.3    | 0.2 <sup>1</sup>    |       | $f^2$            |
| $\text{ClONO}_2 + \text{H}_2\text{O} \rightarrow \text{HOCl} + \text{HNO}_3$           | 0.3                | 0.3 <sup>1</sup>  | 0.006  | 0.004 <sup>1</sup>  | $f^5$ | $f^2$            |
| $\text{HOCl} + \text{HCl} \rightarrow 2 \text{Cl} + \text{H}_2\text{O}$                | 0.3                | 0.2 <sup>1</sup>  | 0.3    | 0.1 <sup>1</sup>    | $f^6$ | $f^2$            |
| $\text{N}_2\text{O}_5 + \text{H}_2\text{O} \rightarrow 2 \text{HNO}_3$                 | 0.03               | 0.02 <sup>1</sup> | 0.0006 | 0.0004 <sup>1</sup> | 0.1   | 0.1 <sup>3</sup> |
| $\text{N}_2\text{O}_5 + \text{HCl} \rightarrow \text{Cl} + \text{NO}_2 + \text{HNO}_3$ | 0.03               | 0.03 <sup>1</sup> | 0.003  | 0.003 <sup>1</sup>  |       |                  |
| $\text{HOBr} + \text{HCl} \rightarrow \text{BrCl} + \text{H}_2\text{O}$                |                    | 0.25 <sup>4</sup> |        |                     |       |                  |
| $\text{BrONO}_2 + \text{HCl} \rightarrow \text{BrCl} + \text{HNO}_3$                   |                    | 0.3 <sup>4</sup>  |        |                     |       | 0.9 <sup>1</sup> |
| $\text{BrONO}_2 + \text{H}_2\text{O} \rightarrow \text{HOBr} + \text{HNO}_3$           |                    | $f^4$             |        |                     |       | $f^4$            |
| $\text{HOBr} + \text{HBr} \rightarrow 2 \text{Br} + \text{H}_2\text{O}$                |                    | $f^4$             |        |                     |       |                  |
| $\text{HOCl} + \text{HBr} \rightarrow \text{BrCl} + \text{H}_2\text{O}$                |                    | $f^4$             |        |                     |       |                  |
| $\text{ClONO}_2 + \text{HBr} \rightarrow \text{BrCl} + \text{HNO}_3$                   |                    | $f^4$             |        | $f^4$               |       |                  |
| $\text{BrONO}_2 + \text{HBr} \rightarrow 2 \text{Br} + \text{HNO}_3$                   |                    | $f^4$             |        |                     |       |                  |
| $\text{N}_2\text{O}_5 + \text{HBr} \rightarrow \text{Br} + \text{NO}_2 + \text{HNO}_3$ |                    |                   |        | $f^4$               |       |                  |

Uptake coefficients are denoted  $f$  where they are not universal constants, see the references for the full formulation.

<sup>1</sup> Burkholder et al. (2015)

<sup>2</sup> Shi et al. (2001) (as recommended by both JPL and IUPAC)

<sup>3</sup> This was retained from the original because the JPL recommendation, which is a function of temperature, evaluates to approximately 0.1 for typical stratospheric values

<sup>4</sup> Crowley et al. (2010)

<sup>5</sup> Steele and Hamill (1981); Zhang et al. (1994); Cox et al. (1994)

<sup>6</sup> Zhang et al. (1994)

5 Additionally, a 21-year run (1989–2009) for both the original and new configuration is produced, with chemistry-radiation feedbacks switched on, to provide a more reliable indication of the impact on stratospheric chemistry. These runs are forced by the IPCC “historic” and RCP 6.0 greenhouse gas scenario (Masui et al., 2011; Meinshausen et al., 2011; van Vuuren et al., 2011) and the A1 scenario for ozone depleting substances (WMO, 2011). We compare these runs to the National Institute of Water and Atmospheric Research - Bodeker Scientific (NIWA-BS) total column ozone dataset (version 3.4, see <http://www.bodekerscientific.com/data/total-column-ozone>). The time span we use for comparison is 1996–2009, excluding 2002. The beginning of the run is not used to ensure any transient effects of the chemistry changes are discounted. The year 2002 is not included because the stratospheric sudden warming that occurred in that year over Antarctica resulted in anomalously low polar ozone in the observations.

## 4.2 Results

The largest effect of the changes to the heterogeneous chemistry is found at southern polar latitudes. Figure 4(a) shows the differences in total column ozone, averaged over the region south of  $65^{\circ}\text{S}$ , between the various sensitivity runs and the control run. Updating the NAT and ice uptake coefficients of the original five reactions (yellow curve) increases ozone during spring. This is expected given that the coefficients were either unchanged or decreased from the original version, effectively decreasing chlorine activation. The magnitude of this change is up to 9 DU and occurs in late September. This change in the NAT and ice coefficients is outweighed by adopting the Shi et al. (2001) formulation for the uptake coefficients on sulphate aerosol (blue curve). The effect of this change is an enhancement of the springtime ozone depletion, peaking at 20 DU in early October. By contrast, the effect of the additional bromine reactions (green curve) is evident from the beginning of the run and amounts to around 10 DU in late winter, before the pronounced springtime ozone depletion begins. The additional bromine reactions are at maximum effect in early spring where they amount to 20 DU of additional ozone depletion. These three changes are combined in the run labeled “All” (red curve), which shows the maximum effect on total column ozone to be a decrease in ozone of 30 DU in late September/early October, but due to the inclusion of the bromine reactions is important in all seasons. The effect from the combination of the three modifications is slightly more than the sum of the individual runs. This effect is confined mostly to September and is up to about 4 DU. Figure 4(b) shows the equivalent for the Northern Hemisphere. The overall impact on ozone is smaller (at maximum 15 DU during March) and it is notable that the addition of bromine is producing the majority of the effect relative to the either of the modifications to the original reactions.

For the rest of this section we focus on the fully interactive simulations, comparing the new heterogeneous chemistry (“New Het.”) to the control simulation and to the NIWA-Bodeker total column ozone dataset. Figure 5 shows the zonal mean total column ozone climatology in each of the model runs. The figure uses crosshatching and stippling to illustrate areas where the model underestimates or overestimates, respectively, the NIWA-BS dataset by more than 30 DU. There are no NIWA-BS data over the winter poles, these areas are marked by the dashed contours. Comparing the two runs, it can be seen that the new heterogeneous chemistry reduces biases in a number of areas: the northern high latitudes during October to February, the equatorial region during August to October, the southern mid-latitudes during August and the southern polar region during the September onset of the ozone hole. The one area where the changes to the heterogeneous chemistry make the model notably worse is the southern polar region during austral summer where the existing underestimation of ozone by the model is exacerbated. This can be seen more clearly in Figure 6 which shows the polar mean (south of  $65^{\circ}\text{S}$ ) total column ozone climatology. During springtime, peak ozone depletion is enhanced by around 25 DU (note: this is slightly smaller than that indicated in Figure 4, likely reflecting that the 1999 forcings during the sensitivity runs were more conducive to ozone depletion than the 1996–2009 average). This increased depletion persists with a similar magnitude through summer. The effect of the new configuration is that the extent of peak ozone depletion is now overestimated relative to the NIWA-BS dataset, whereas for the control run it was underestimated. An issue with the control run illustrated here is the slow summertime replenishing of ozone. Although, “New Het.” replenishes ozone at a similar rate, the increase in the depth of the ozone hole means that the summertime discrepancy in ozone increases significantly relative to NIWA-BS.

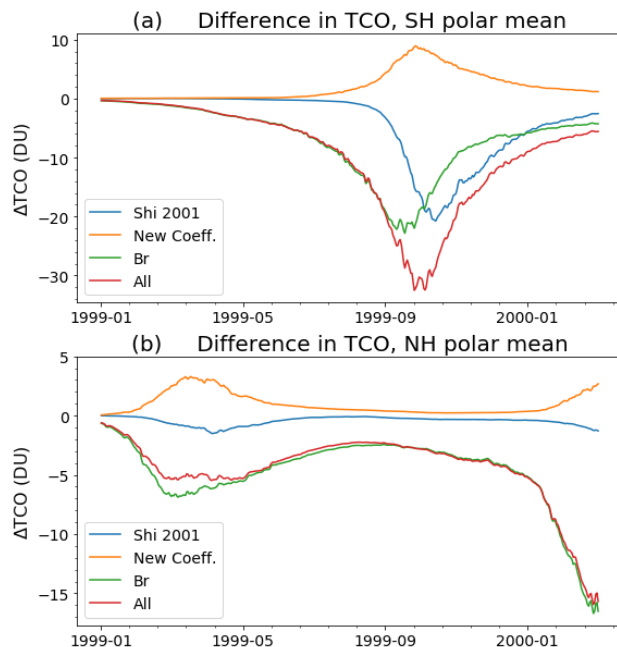

**Figure 4.** The difference in mean total column ozone (a) south of  $65^{\circ}\text{S}$  and (b) north of  $65^{\circ}\text{N}$ , between the various sensitivity runs and the control run.

The overestimation of springtime ozone depletion shown by Figure 5 is linked to model temperature biases which influence polar ozone depletion. We illustrate this in Figure 7, which shows the relationship between polar total column ozone and polar lower stratospheric mean temperature (south of  $65^{\circ}\text{S}$  and pressure levels between 100–10 hPa) for October in the model runs and the NIWA-BS dataset (with temperatures from the ERA-Interim reanalysis (Dee et al., 2011)). The model has a substantial cold bias relative to the ERA-Interim temperature which is not solely due to differences in ozone. Based on the gradient of the ozone-temperature relationship shown here, a correction of the temperature bias would reveal a superior simulation of the ozone depletion by the “New Het.” configuration.

Figure 8 shows the difference in zonal mean ozone mixing ratio during October. Student’s  $t$  test is used to identify regions where the model runs differ significantly. The enhanced polar ozone depletion is primarily at the lower reaches of the ozone layer between around 12 to 24 km in altitude. Figure 9 shows the change in chemical flux of the various ozone production/destruction pathways in this southern polar lower stratosphere region. The largest change is via the  $\text{Cl}_2\text{O}_2$  photolysis cycle. This change represents an 8% increase over the flux in the control run.

Table 2 lists the differences in flux of the various heterogeneous reactions between the control and “New Het.” runs. The changes in the original five reactions include an increase in the rate of the  $\text{ClONO}_2 + \text{HCl}$  reaction at the expense of the hydrolysis reaction. This is almost entirely due to the change in the calculation of the uptake coefficient on sulphate aerosol. Also, the rate of  $\text{N}_2\text{O}_5$  hydrolysis decreases; in this case the uptake rates on both ice and NAT have been lowered by a third

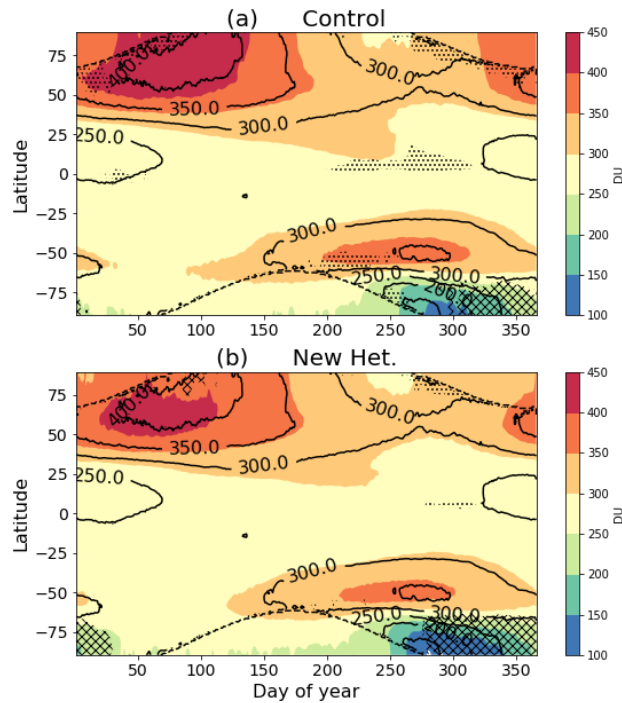

**Figure 5.** Zonal mean total column ozone climatology (1996–2009, excl. 2002) of the (a) control and (b) “New Het.” runs. Contours show the NIWA-BS data, crosshatching/stippling indicates where the model under/overestimates NIWA-BS data by more than 30 DU. Dashed contours mark the absence of NIWA-BS data.

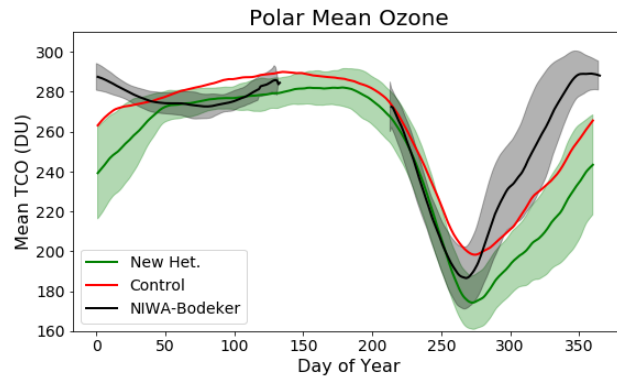

**Figure 6.** Southern polar mean total column ozone climatology of the “New Het.” (green) and control (red) runs as well as the NIWA-BS data (black). The shaded bands show  $\pm 1$  standard deviation, uncertainty in the control run is not shown here for clarity. The average is over the region south of  $65^{\circ}\text{S}$  and for the years 1996–2009 (excl. 2002).

(while, the reaction on sulfate is unchanged). The most important of the new bromine reactions are  $\text{BrONO}_2 + \text{HCl}$  and  $\text{BrONO}_2 + \text{H}_2\text{O}$ , the two bromine reactions for which reaction on sulphate aerosols is considered.

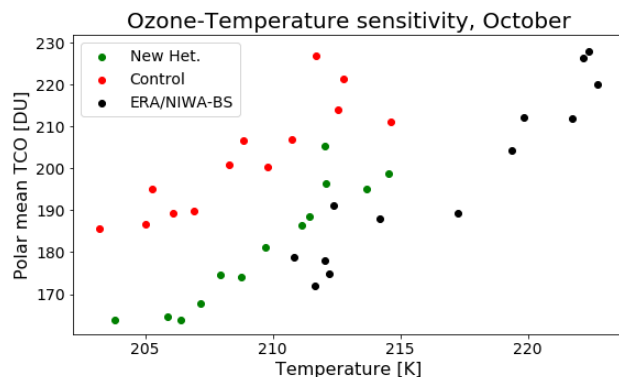

**Figure 7.** Southern polar mean total column ozone versus the mean temperature in the polar lower stratosphere for the “New Het.” (green) and control (red) runs as well as NIWA-BS / ERA-Interim (black). The average is taken over the region south of 65°S; temperature is additionally averaged over the 100–10 hPa pressure range. Data cover the years 1996–2009 (excl. 2002).

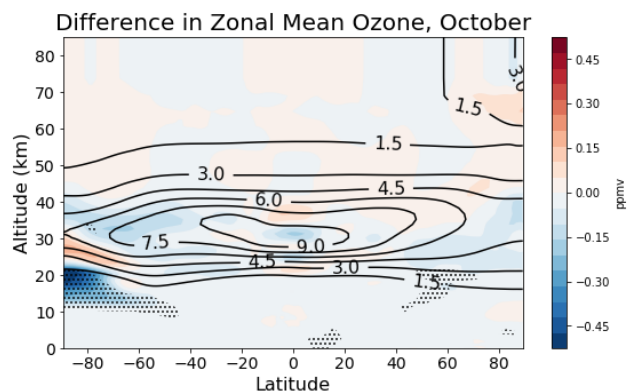

**Figure 8.** Difference in zonal mean ozone between the “New Het.” and control runs during October 1996–2009 (shading). Contours illustrate the control run climatology. Stippling indicates the difference is significant according to Student’s *t* test ( $p < 0.01$ ).

Figure 10(a) shows the October SH polar mean vertical profile of the bromine species: BrO, HBr and BrONO<sub>2</sub> in the “New Het.” (solid curves) and control (dashed) runs. The effect on BrONO<sub>2</sub>, suggested by the fluxes in Table 2, is shown to be quite substantial here. The lower peak in BrONO<sub>2</sub> at around 12 km is strongly reduced, with a co-located decrease in BrO and increase in HBr localized to the the same altitude range. Figure 10(b) shows the equivalent to Figure 10(a) for the chlorine species: ClO, Cl<sub>2</sub>O<sub>2</sub>, HCl and ClONO<sub>2</sub>. The impact on the chlorine species varies over a larger altitude range. ClONO<sub>2</sub> increases broadly over both peaks around 19 and 26 km, this is primarily due to the decrease uptake on NAT. Below about 15 km, where SA is more prominent, ClONO<sub>2</sub> is reduced due to the new loss pathway of reaction with HCl on SA.



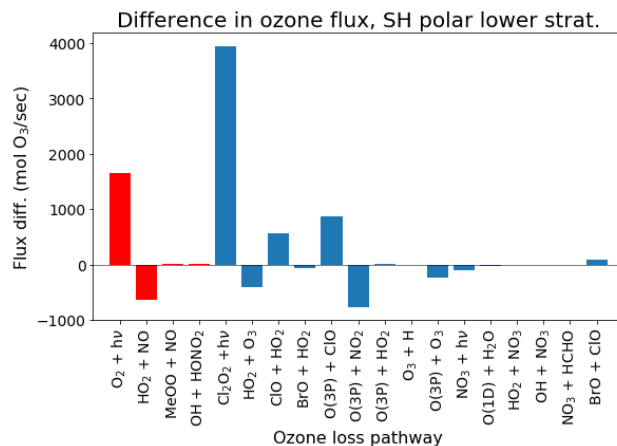

**Figure 9.** Annual difference in ozone production (red) / destruction (blue) flux between “New Het.” and control runs, in the lower stratosphere (12–24 km) south of 65°S 1996–2009.

**Table 2.** Difference in heterogeneous reaction flux between “New Het.” and control runs, 1996–2009.

| Reaction                                         | Flux (mol/sec) |          |        |        |
|--------------------------------------------------|----------------|----------|--------|--------|
|                                                  | Control        | New Het. | Diff.  | % Diff |
| ClONO <sub>2</sub> + HCl                         | 468            | 747      | +279   | +59.6  |
| ClONO <sub>2</sub> + H <sub>2</sub> O            | 1300           | 1040     | -266   | -20.4  |
| HOCl + HCl                                       | 1230           | 1190     | -46.7  | -3.8   |
| N <sub>2</sub> O <sub>5</sub> + H <sub>2</sub> O | 8180           | 7880     | -296   | -3.6   |
| N <sub>2</sub> O <sub>5</sub> + HCl              | 3.02           | 3.13     | +0.114 | +3.8   |
| HOBr + HCl                                       | -              | 22.9     | -      | -      |
| BrONO <sub>2</sub> + HCl                         | -              | 981      | -      | -      |
| BrONO <sub>2</sub> + H <sub>2</sub> O            | -              | 560      | -      | -      |
| HOBr + HBr                                       | -              | 13.1     | -      | -      |
| HOCl + HBr                                       | -              | 0.167    | -      | -      |
| ClONO <sub>2</sub> + HBr                         | -              | 0.209    | -      | -      |
| BrONO <sub>2</sub> + HBr                         | -              | 0.509    | -      | -      |
| N <sub>2</sub> O <sub>5</sub> + HBr              | -              | 0.000158 | -      | -      |

### 4.3 Discussion

The changes to the heterogeneous chemistry result in increased SH springtime polar ozone depletion. This has the advantage of more accurately simulating the timing and rate of decline of ozone in early spring. During October, the peak ozone depletion is slightly overestimated relative to the NIWA-BS data, however this is likely due to the model’s cold bias (see Figure 7). The

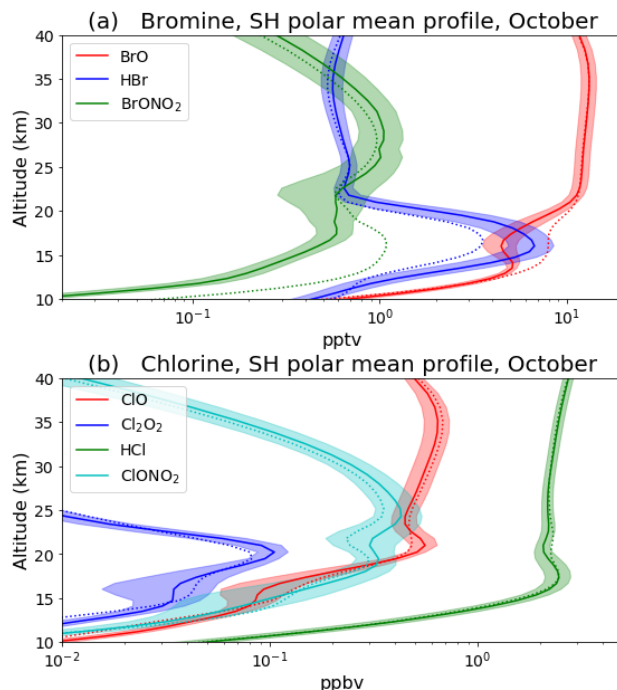

**Figure 10.** Vertical profile of (a) the species: BrO, HBr, and BrONO<sub>2</sub> and (b) ClO, Cl<sub>2</sub>O<sub>2</sub>, HCl, and ClONO<sub>2</sub> for October, averaged over 1996–2009 and south of 65°S. “New Het.” is shown with solid curves and the control run with dashed curves. Shading indicates  $\pm 1$  standard deviation around the “New Het.” mean.

downside of this change occurs during summer where the model has a tendency to replenish the SH polar ozone too slowly. It is possible the increased ozone depletion itself exacerbates this problem as it has been shown that increased ozone depletion acts to delay the break-up of the polar vortex (Haigh and Roscoe, 2009; McLandress et al., 2010; Keeble et al., 2014). This summertime ozone problem could be both dynamical, for example: a lack of planetary wave activity which delays the vortex  
 5 break-up, or chemical, for example: in the conversion of radicals back into reservoir species. This remains an important area for model development.

Another area of possible model development is the treatment of PSCs in the UKCA. In the case of NAT, particles are assumed to form when HNO<sub>3</sub> reaches saturation (following Hanson and Mauersberger (1988)). More recent work has found that NAT formation does not occur at the equilibrium temperature predicted by this assumption, but at temperatures around  
 10 3K lower (Wegner et al., 2013). This would suggest that a HNO<sub>3</sub> supersaturation of around 10 ought to be required for NAT formation. It is possible that this may not be very important given that the role of NAT is somewhat de-emphasized in our new heterogeneous chemistry scheme, with the corresponding uptake coefficients on NAT lowered in four of the five original reactions and not considered for six of the additional eight reactions. Perhaps of more consequence is the treatment of sulfate aerosol. UKCA considers sulfate aerosol, however sulfate aerosol absorbs HNO<sub>3</sub> at lower temperatures, forming what is known  
 15 as a supercooled ternary solution (STS) (Hamill et al., 1996). Data regarding reactions on STS are more limited, but it has been

shown to be important in some cases. For example, Zhang et al. (1995) found that the rate of  $\text{N}_2\text{O}_5$  hydrolysis on STS to decrease as the amount of  $\text{HNO}_3$  in solution is increased, while the rate of  $\text{ClONO}_2$  hydrolysis is unaffected by the presence of  $\text{HNO}_3$ .

A hazard of modeling stratospheric chemistry is the limited experimental data on which parameterizations are based. Of the eight reactions added to the heterogeneous chemistry scheme, the most active of these are the reactions of  $\text{BrONO}_2$  with  $\text{HCl}$  and  $\text{H}_2\text{O}$  on sulphate aerosol. The experimental work on these reactions (Hanson and Ravishankara, 1995; Hanson et al., 1996; Hanson, 2003) focused mostly on the hydrolysis reaction. The uptake coefficient of 0.9 for  $\text{BrONO}_2 + \text{HCl}$ , recommend by JPL, is based upon just two experiments (Hanson et al., 1996). One tests 60 wt%  $\text{H}_2\text{SO}_4$  with a small amount of  $\text{HCl}$  (approx.  $10^{-3}\text{M}$ ), the other 48 wt% with 0.3M  $\text{HCl}$ , both at 229 K, finding uptake coefficients of  $0.9 \pm 0.2$  and  $1.0 \pm 0.2$ , respectively. Hence, there may be substantial uncertainty associated with this value. Perhaps because of this uncertainty, this reaction is not included in some chemistry-climate models; for example, the Whole Atmosphere Community Climate Model (WACCM) excludes this reaction while including the  $\text{BrONO}_2 + \text{H}_2\text{O}$  reaction (Solomon et al., 2015). However, a coefficient as large as 0.9 is not necessarily surprising given that the parameterization of  $\text{BrONO}_2 + \text{H}_2\text{O}$  (which is based on much more experimental data) gives an uptake coefficient of 0.8 for solutions with  $\text{H}_2\text{SO}_4$  at less than 65%wt. As Table 2 shows  $\text{BrONO}_2 + \text{HCl}$  to be relatively important, we choose to include it despite the associated uncertainty.

Compared to the  $\text{BrONO}_2$  reactions with  $\text{H}_2\text{O}$  and  $\text{HCl}$  the other additional reactions are shown to have relatively little impact. However, we include these in the UKCA heterogeneous chemistry framework for completeness, as it is possible that future work may reveal them to be more relevant. In particular, further investigation of these reactions on sulphate aerosols would be useful given that the uptake of  $\text{BrONO}_2$  is known to be so large.

The sulfate aerosol used in this work is a climatology representing the “background” level, so the effect on ozone demonstrated here could be perhaps thought of as a lower limit. Further work looking at the sensitivity of this heterogeneous chemistry scheme to the effect of elevated aerosol levels (e.g. from volcanic eruptions) would also be of interest.

Given the importance of bromine activation on sulfate aerosols, another interesting aspect is the sensitivity of ozone depletion to the abundance of bromine. Yang et al. (2014) examined this, also using the UM-UKCA model, finding a 5% decrease in springtime SH polar TCO ( $\sim 10$  DU) in response to an increase in stratospheric inorganic bromine resulting from a doubling of the very short lived species (VSLS) source. The uptake coefficients used by Yang et al. (2014) differ from those used here; this configuration shows a larger impact on ozone. It is therefore possible that the ozone depletion sensitivity demonstrated by Yang et al. (2014) is somewhat of an underestimation. Yang et al. (2014) also finds the ozone depletion sensitivity to bromine concentration to be dependent on the amount of chlorine present. Thus, a deeper study of the role of the chlorine/bromine cross reactions would be an interesting area for further study with this new configuration of heterogeneous chemistry.

## 5 Summary

Improvements to the UKCA model have been made in two areas: the photolysis and the heterogeneous chemistry schemes. The photolysis scheme was improved by the addition of solar variability which modifies the solar flux entering the photolysis

rate calculations. The solar cycle is based on observations and is spectrally resolved. At short wavelengths, the amplitude of the solar cycle is of the order of 10%. Consequently, reactions (such as the photolysis of oxygen) that require this short-wavelength radiation vary proportionately. We show that the effect of the added solar cycle on total column ozone in the extra-tropical regions is of the order of 1%, in phase with the solar cycle. The effect is likely to be larger in polar regions although the model run in this study is not of sufficient length to provide reliable estimates given the increased variability of ozone in these regions.

The second improvement is to the heterogeneous chemistry scheme. This consisted of updating the uptake coefficients of the five pre-existing reactions as well as adding a further eight reactions. The impact on ozone from these changes were substantial, amounting to around 25 DU of additional springtime SH polar ozone depletion, with significant effect coming from both the updated original reactions and the new reactions. Comparison with the NIWA-BS ozone dataset shows that the new heterogeneous chemistry scheme simulates springtime ozone better, especially when accounting for the model temperature bias, although the increase in springtime ozone depletion leads to an increase in the low-ozone bias during summer.

*Code and data availability.* The Met Office Unified Model is available for use under licence. For information on how to apply for a licence; see <http://www.metoffice.gov.uk/research/modelling-systems/unified-model> (last access: 30 Oct 2018). Both developments are available in the UM truck from vn11.2. NIWA-BS total column ozone data (vn3.4) were obtained from <http://www.bodekerscientific.com/data/total-column-ozone> (retrieved 12 Oct 2018). ERA-Interim data were obtained from <http://apps.ecmwf.int/datasets/data/interim-full-mnth/levtype=pl/> (retrieved 16 May 2018). Data from the UM-UKCA model runs and the code used to produce the figures in this paper can be found at <https://doi.org/10.5281/zenodo.1486305>

*Author contributions.* FD wrote the paper with input from all authors. The solar cycle code was originally written by OM, with modifications by FD. The heterogeneous chemistry code was written by JK and FD with assistance from all authors. Model runs and analysis were produced by FD with advice from OM and GZ

*Competing interests.* The authors declare that they have no conflict of interest.

*Acknowledgements.* This work has been funded by the New Zealand Government Ministry for Business, Innovation, and Employment (MBIE) through The Deep South National Science Challenge. This work has also been supported by NIWA as part of its Government-funded, core research. Also, funding was received from European Community's Seventh Framework Programme (FP7/2007-2013) under grant agreement no. 603557 (StratoClim). XY acknowledges financial support from NERC/UK through the project NE/M015394/1. The authors wish to acknowledge the contribution of NeSI high-performance computing facilities to the results of this research. New Zealand's national facilities are provided by the New Zealand eScience Infrastructure (NeSI) and funded jointly by NeSI's collaborator institutions and

through MBIE's Research Infrastructure programme (<https://www.nesi.org.nz>). We would also like to thank Bodeker Scientific, funded by the New Zealand Deep South National Science Challenge, for providing the combined NIWA-BS total column ozone database

## References

- Angell, J. K.: On the Relation between Atmospheric Ozone and Sunspot Number, *Journal of Climate*, 2, 1404–1416, [https://doi.org/10.1175/1520-0442\(1989\)002<1404:OTRBAO>2.0.CO;2](https://doi.org/10.1175/1520-0442(1989)002<1404:OTRBAO>2.0.CO;2), 1989.
- Bednarz, E. M., Maycock, A. C., Telford, P. J., Braesicke, P., Abraham, N. L., and Pyle, J. A.: Simulating the atmospheric response to the  
5 11-year solar cycle forcing with the UM-UKCA model: the role of detection method and natural variability, *Atmospheric Chemistry and Physics Discussions*, pp. 1–44, <https://doi.org/10.5194/acp-2018-129>, 2018.
- Bian, H. and Prather, M. J.: Fast-J2: Accurate Simulation of Stratospheric Photolysis in Global Chemical Models, *Journal of Atmospheric Chemistry*, 41, 281–296, 2002.
- Braesicke, P., Keeble, J., Yang, X., Stiller, G., Kellmann, S., Abraham, N. L., Archibald, A., Telford, P., and Pyle, J. A.: Circulation anomalies  
10 in the Southern Hemisphere and ozone changes, *Atmospheric Chemistry and Physics*, 13, 10677–10688, <https://doi.org/10.5194/acp-13-10677-2013>, 2013.
- Burkholder, J. B., Sander, S. P., Abbatt, J. P. D., Barker, J. R., Huie, R. E., Kolb, C. E., Kurylo, M. J., Orkin, V. L., Wilmouth, D. M., and Wine, P. H.: Chemical Kinetics and Photochemical Data for Use in Atmospheric Studies Evaluation Number 18, Tech. rep., Jet Propulsion Laboratory, Pasadena, California, <http://jpldataeval.jpl.nasa.gov/>, 2015.
- 15 Calisesi, Y. and Matthes, K.: The middle atmospheric ozone response to the 11-year solar cycle, *Space Science Reviews*, 125, 273–286, <https://doi.org/10.1007/s11214-006-9063-4>, 2006.
- Chapman, S.: On Ozone and Atomic Oxygen in the Upper Atmosphere, *Philosophical Magazine*, 10, 369–383, 1930.
- Chipperfield, M. P., Bekki, S., Dhomse, S., Harris, N. R. P., Hassler, B., Hossaini, R., Steinbrecht, W., Thiéblemont, R., and Weber, M.:  
20 Detecting recovery of the stratospheric ozone layer, *Nature*, 549, 211–218, <https://doi.org/10.1038/nature23681>, <http://dx.doi.org/10.1038/nature23681>, 2017.
- Cox, R. A., MacKenzie, A. R., Muller, R. H., Peter, T., and Crutzen, P. J.: Activation of stratospheric chlorine by reactions in liquid sulphuric acid, *Geophysical Research Letters*, 22, 1439–1442, <https://doi.org/10.1029/93GL03073>, 1994.
- Crowley, J. N., Ammann, M., Cox, R. A., Hynes, R. G., Jenkin, M. E., Mellouki, A., Rossi, M. J., Troe, J., and Wallington, T. J.: Evaluated  
25 kinetic and photochemical data for atmospheric chemistry: Volume v -heterogeneous reactions on solid substrates, *Atmospheric Chemistry and Physics*, 10, 9059–9223, <https://doi.org/10.5194/acp-10-9059-2010>, 2010.
- Crutzen, P. J.: Estimates of possible future ozone reductions from continued use of fluoro-chloro-methanes (CF<sub>2</sub>Cl<sub>2</sub>, CFC13), *Geophysical Research Letters*, 1, 205–208, <https://doi.org/10.1029/GL001i005p00205>, 1974.
- Dameris, M., Matthes, S., Deckert, R., Grewe, V., and Ponater, M.: Solar cycle effect delays onset of ozone recovery, *Geophysical Research Letters*, 33, 1–4, <https://doi.org/10.1029/2005GL024741>, 2006.
- 30 Daniel, J. S., Velders, G. J. M., Douglass, A., Forster, P., Hauglustaine, D., Isaksen, I., Kuijpers, L., McCulloch, A., and Wallington, T.: Halocarbon Scenarios, Ozone Depletion Potentials, and Global Warming Potentials, Chapter 8 in World Meteorological Organization: Scientific assessment of ozone depletion: 2006, Global Ozone Research and Monitoring Project – Report No. 50, Tech. rep., Geneva, 2007.
- Dee, D. P., Uppala, S. M., Simmons, A. J., Berrisford, P., Poli, P., Kobayashi, S., Andrae, U., Balmaseda, M. A., Balsamo, G., Bauer, P., Bechtold, P., Beljaars, A. C. M., van de Berg, L., Bidlot, J., Bormann, N., Delsol, C., Dragani, R., Fuentes, M., Geer, A. J., Haimberger, L., Healy, S. B., Hersbach, H., Hólm, E. V., Isaksen, L., Kållberg, P., Köhler, M., Matricardi, M., McNally, A. P., Monge-Sanz, B. M., Morcrette, J. J., Park, B. K., Peubey, C., de Rosnay, P., Tavolato, C., Thépaut, J. N., and Vitart, F.: The ERA-Interim reanalysis:  
35

- Configuration and performance of the data assimilation system, *Quarterly Journal of the Royal Meteorological Society*, 137, 553–597, <https://doi.org/10.1002/qj.828>, 2011.
- Dennison, F., McDonald, A., and Morgenstern, O.: The Influence of Ozone Forcing on Blocking in the Southern Hemisphere, *Journal of Geophysical Research: Atmospheres*, pp. 358–371, <https://doi.org/10.1002/2016JD025033>, 2016.
- 5 Dennison, F. W., McDonald, A. J., and Morgenstern, O.: The effect of ozone depletion on the Southern Annular Mode and stratosphere-troposphere coupling, *Journal of Geophysical Research Atmospheres*, 120, 1–8, <https://doi.org/10.1002/2014JD023009>, 2015.
- Egorova, T., Rozanov, E., Zubov, V., Schmutz, W., and Peter, T.: Influence of solar 11-year variability on chemical composition of the stratosphere and mesosphere simulated with a chemistry-climate model, *Advances in Space Research*, 35, 451–457, <https://doi.org/10.1016/j.asr.2005.01.048>, 2005.
- 10 Esentürk, E., Luke Abraham, N., Archer-Nicholls, S., Mitsakou, C., Griffiths, P., Archibald, A., and Pyle, J.: Quasi-Newton methods for atmospheric chemistry simulations: Implementation in UKCA UM vn10.8, *Geoscientific Model Development*, 11, 3089–3108, <https://doi.org/10.5194/gmd-11-3089-2018>, 2018.
- Gillett, N. P., Kell, T. D., and Jones, P. D.: Regional climate impacts of the Southern Annular Mode, *Geophysical Research Letters*, 33, 1–4, <https://doi.org/10.1029/2006GL027721>, 2006.
- 15 Gruzdev, A. N.: Estimate of the effect of the 11-year solar activity cycle on the ozone content in the stratosphere, *Geomagnetism and Aeronomy*, 54, 633–639, 2014.
- Haigh, J. D. and Roscoe, H. K.: The final warming date of the Antarctic polar vortex and influences on its interannual variability, *Journal of Climate*, 22, 5809–5819, <https://doi.org/10.1175/2009JCLI2865.1>, 2009.
- Hall, A. and Visbeck, M.: Synchronous variability in the Southern Hemisphere atmosphere, sea ice, and ocean resulting from the annular  
20 mode, *Journal of Climate*, 15, 3043–3057, [https://doi.org/10.1175/1520-0442\(2002\)015<3043:SVITSH>2.0.CO;2](https://doi.org/10.1175/1520-0442(2002)015<3043:SVITSH>2.0.CO;2), 2002.
- Hamill, P., Tabazadeh, A., Kinne, S., Toon, O. B., and Turco, R. P.: On the growth of ternary system HNO<sub>3</sub>/H<sub>2</sub>SO<sub>4</sub>/H<sub>2</sub>O aerosol particles in the stratosphere, *Geophysical Research Letters*, 23, 753–756, 1996.
- Hanson, D. R.: Reactivity of BrONO<sub>2</sub> and HOBr on sulfuric acid solutions at low temperatures, *Journal of Geophysical Research*, 108, 4239, <https://doi.org/10.1029/2002JD002519>, 2003.
- 25 Hanson, D. R. and Mauersberger, K.: Laboratory studies of the nitric acid trihydrate: Implications for the south polar stratosphere, *Geophysical Research Letters*, 15, 855–858, <https://doi.org/10.1029/GL015i008p00855>, 1988.
- Hanson, D. R. and Ravishankara, A. R.: Heterogeneous chemistry of bromine species in sulfuric acid under stratospheric conditions, *Geophysical Research Letters*, 22, 385–388, 1995.
- Hanson, D. R., Ravishankara, A. R., and Lovejoy, E. R.: Reaction of BrONO<sub>2</sub> with H<sub>2</sub>O on submicron sulfuric acid aerosol and the impli-  
30 cations for the lower stratosphere, *Journal of Geophysical Research*, 101, 9063–9069, <https://doi.org/10.1029/96JD00347>, 1996.
- Ivy, D. J., Solomon, S., Calvo, N., and Thompson, D. W.: Observed connections of Arctic stratospheric ozone extremes to Northern Hemisphere surface climate, *Environmental Research Letters*, 12, <https://doi.org/10.1088/1748-9326/aa57a4>, 2017.
- Jöckel, P., Tost, H., Pozzer, A., Brühl, C., Buchholz, J., Ganzeveld, L., Hoor, P., Kerkweg, A., Lawrence, M. G., Sander, R., Steil, B., Stiller, G., Tanarhte, M., Taraborrelli, D., van Aardenne, J., and Lelieveld, J.: and Physics The atmospheric chemistry general circulation  
35 model ECHAM5 / MESSy1 : consistent simulation of ozone from the surface to the mesosphere, *Atmospheric Chemistry and Physics*, 6, 5067–5104, <https://doi.org/10.5194/acp-6-5067-2006>, 2006.

- Keeble, J., Braesicke, P., Abraham, N. L., Roscoe, H. K., and Pyle, J. A.: The impact of polar stratospheric ozone loss on southern Hemisphere stratospheric circulation and climate, *Atmospheric Chemistry and Physics*, 14, 13 705–13 717, <https://doi.org/10.5194/acp-14-13705-2014>, 2014.
- Keeble, J., Brown, H., Abraham, N. L., Harris, N. R., and Pyle, J. A.: On ozone trend detection: Using coupled chemistry-climate simulations to investigate early signs of total column ozone recovery, *Atmospheric Chemistry and Physics*, 18, 7625–7637, <https://doi.org/10.5194/acp-18-7625-2018>, 2018.
- Kodera, K.: The role of dynamics in solar forcing, *Space Science Reviews*, 125, 319–330, <https://doi.org/10.1007/s11214-006-9066-1>, 2006.
- Kuroda, Y., Yamazaki, K., and Shibata, K.: Role of ozone in the solar cycle modulation of the North Atlantic Oscillation, *Journal of Geophysical Research Atmospheres*, 113, 1–11, <https://doi.org/10.1029/2007JD009336>, 2008.
- 10 Labitzke, K., Austin, J., Butchart, N., Knight, J., Takahashi, M., Nakamoto, M., Nagashima, T., Haigh, J., and Williams, V.: The global signal of the 11-year solar cycle in the stratosphere: Observations and models, *Journal of Atmospheric and Solar-Terrestrial Physics*, 64, 203–210, [https://doi.org/10.1016/S1364-6826\(01\)00084-0](https://doi.org/10.1016/S1364-6826(01)00084-0), 2002.
- Langematz, U., Grenfell, J. L., Matthes, K., Mieth, P., Kunze, M., Steil, B., and Brühl, C.: Chemical effects in 11-year solar cycle simulations with the Freie Universität Berlin Climate Middle Atmosphere Model with online chemistry (FUB-CMAM-CHEM), *Geophysical Research Letters*, 32, 1–4, <https://doi.org/10.1029/2005GL022686>, 2005.
- 15 Lary, D. J. and Pyle, J. A.: Diffuse radiation, twilight, and photochemistry — II, *Journal of Atmospheric Chemistry*, 13, 393–406, <https://doi.org/https://doi.org/10.1007/BF00057754>, 1991.
- Lean, J., Rottman, G., Harder, J., and Kopp, G.: *SORCE Contributions to New Understanding of Global Change and Solar Variability*, *Solar Physics*, 230, 27–53, [https://doi.org/10.1007/0-387-37625-9\\_3](https://doi.org/10.1007/0-387-37625-9_3), 2005.
- 20 Marshall, G. J.: Half-century seasonal relationships between the Southern Annular Mode and Antarctic temperatures, *International Journal of Climatology*, 27, 373–383, <https://doi.org/10.1002/joc>, 2007.
- Masui, T., Matsumoto, K., Hijioka, Y., Kinoshita, T., Nozawa, T., Ishiwatari, S., Kato, E., Shukla, P. R., Yamagata, Y., and Kainuma, M.: An emission pathway for stabilization at 6 Wm<sup>-2</sup> radiative forcing, *Climatic Change*, 109, 59–76, <https://doi.org/10.1007/s10584-011-0150-5>, 2011.
- 25 Maycock, A. C., Matthes, K., Tegtmeier, S., Thiéblemont, R., Hood, L., and Kiel, C.-a. U.: The representation of solar cycle signals in stratospheric ozone – Part 1 : A comparison of recently updated satellite observations, *Atmospheric Chemistry and Physics*, 16, 10021–10043, <https://doi.org/10.5194/acp-16-10021-2016>, 2016.
- Maycock, A. C., Matthes, K., Tegtmeier, S., Schmidt, H., Thiéblemont, R., Hood, L., Bekki, S., Deushi, M., Jöckel, P., Kirner, O., Kunze, M., Marchand, M., Marsh, D. R., Michou, M., Revell, L. E., Rozanov, E., Stenke, A., Yamashita, Y., and Yoshida, K.: The representation of solar cycle signals in stratospheric ozone. Part II: Analysis of global models, *Atmospheric Chemistry and Physics Discussions*, pp. 1–32, <https://doi.org/10.5194/acp-2017-477>, 2017.
- 30 McGrath, M. P., Clemitshaw, K. C., Rowland, F. S., and Hehre, W. J.: Structures, relative stabilities, and vibrational spectra of isomers of chlorine oxide dimer (Cl<sub>2</sub>O<sub>2</sub>): the role of the chlorine oxide dimer in antarctic ozone depleting mechanisms, *Journal of Physical Chemistry*, 94, 6126–6132, <https://doi.org/10.1021/j100378a089>, 1990.
- 35 McLandress, C., Jonsson, A. I., Plummer, D. A., Reader, M. C., Scinocca, J. F., and Shepherd, T. G.: Separating the dynamical effects of climate change and ozone depletion. Part I: Southern hemisphere stratosphere, *Journal of Climate*, 23, 5002–5020, <https://doi.org/10.1175/2010JCLI3586.1>, 2010.



- McLandress, C., Shepherd, T. G., Scinocca, J. F., Plummer, D. A., Sigmond, M., Jonsson, A. I., and Reader, M. C.: Separating the dynamical effects of climate change and ozone depletion. Part II: Southern Hemisphere troposphere, *Journal of Climate*, 24, 1850–1868, <https://doi.org/10.1175/2010JCLI3958.1>, 2011.
- Meinshausen, M., Smith, S. J., Calvin, K., Daniel, J. S., Kainuma, M. L. T., Lamarque, J., Matsumoto, K., Montzka, S. A., Raper, S. C. B.,  
5 Riahi, K., Thomson, A., Velders, G. J. M., and van Vuuren, D. P. P.: The RCP greenhouse gas concentrations and their extensions from 1765 to 2300, *Climatic Change*, 109, 213–241, <https://doi.org/10.1007/s10584-011-0156-z>, 2011.
- Molina, M. J. and Rowland, F. S.: Stratospheric sink for chlorofluoromethanes: chlorine atom-catalysed destruction of ozone, *Nature*, 249, 810–812, <https://doi.org/10.1038/249810a0>, 1974.
- Morgenstern, O., Braesicke, P., O'Connor, F. M., Bushell, A. C., Johnson, C. E., Osprey, S. M., and Pyle, J. A.: Evaluation of the new UKCA  
10 climate-composition model – Part 1: The stratosphere, *Geoscientific Model Development*, 2, 43–57, <https://doi.org/10.5194/gmd-2-43-2009>, 2009.
- Morgenstern, O., Giorgetta, M. A., Shibata, K., Eyring, V., Waugh, D. W., Shepherd, T. G., Akiyoshi, H., Austin, J., Baumgaertner, A. J. G., Bekki, S., Braesicke, P., Brühl, C., Chipperfield, M., Cugnet, D., Dameris, M., Dhomse, S., Frith, S. M., Garny, H., Gettelman, A., Hardiman, S. C., Hegglin, M. I., Jöckel, P., Kinnison, D. E., Lamarque, J. F., Mancini, E., Manzini, E., Marchand, M., Michou, M., Nakamura,  
15 T., Nielsen, J. E., Olivie, D., Pitari, G., Plummer, D. A., Rozanov, E., Scinocca, J. F., Smale, D., Teyssède, H., Toohey, M., Tian, W., and Yamashita, Y.: Review of the formulation of present-generation stratospheric chemistry-climate models and associated external forcings, *Journal of Geophysical Research*, 115, <https://doi.org/10.1029/2009JD013728>, <http://doi.wiley.com/10.1029/2009JD013728>, 2010.
- Morgenstern, O., Hegglin, M., Rozanov, E., O'Connor, F., Luke Abraham, N., Akiyoshi, H., Archibald, A., Bekki, S., Butchart, N., Chipperfield, M., Deushi, M., Dhomse, S., Garcia, R., Hardiman, S., Horowitz, L., Jöckel, P., Josse, B., Kinnison, D., Lin, M., Mancini, E., Manyin,  
20 M., Marchand, M., Marécal, V., Michou, M., Oman, L., Pitari, G., Plummer, D., Revell, L., Saint-Martin, D., Schofield, R., Stenke, A., Stone, K. A., Sudo, K., Tanaka, T., Tilmes, S., Yamashita, Y., Yoshida, K., and Zeng, G.: Review of the global models used within phase 1 of the Chemistry-Climate Model Initiative (CCMI), *Geoscientific Model Development*, 10, 639–671, <https://doi.org/10.5194/gmd-10-639-2017>, 2017.
- Neu, J. L., Prather, M. J., and Penner, J. E.: Global atmospheric chemistry: Integrating over fractional cloud cover, *Journal of Geophysical  
25 Research Atmospheres*, 112, 1–12, <https://doi.org/10.1029/2006JD008007>, 2007.
- Newman, P. A., Daniel, J. S., Waugh, D. W., and Nash, E. R.: A new formulation of equivalent effective stratospheric chlorine (EESC), *Atmos. Chem. Phys. Atmospheric Chemistry and Physics*, 7, 4537–4552, <https://doi.org/10.5194/acpd-7-3963-2007>, 2007.
- O'Connor, F. M., Johnson, C. E., Morgenstern, O., Abraham, N. L., Braesicke, P., Dalvi, M., Folberth, G. a., Sanderson, M. G., Telford, P. J., Voulgarakis, a., Young, P. J., Zeng, G., Collins, W. J., and Pyle, J. a.: Evaluation of the new UKCA climate-composition model-Part 2:  
30 The troposphere, *Geoscientific Model Development*, 7, 41–91, <https://doi.org/10.5194/gmd-7-41-2014>, 2014.
- Rayner, N. A., Parker, D. E., Horton, E. B., Folland, C. K., Alexander, L. V., Rowell, D. P., Kent, E. C., and Kaplan, A.: Global analyses of sea surface temperature, sea ice, and night marine air temperature since the late nineteenth century, *Journal of Geophysical Research*, 108, 4407, <https://doi.org/10.1029/2002JD002670>, 2003.
- Reinsel, G. C., Weatherhead, E. C., Tiao, G. C., Miller, A. J., Nagatani, R. M., Wuebbles, D. J., and Flynn, L. E.: On detection of turnaround and recovery in trend for ozone, *Journal of Geophysical Research*, 107, <https://doi.org/10.1029/2001JD000500>, 2002.
- Sen Gupta, A. and England, M. H.: Coupled Ocean – Atmosphere – Ice Response to Variations in the Southern Annular Mode, *Journal of Climate*, 19, 4457–4486, 2006.

- Shi, Q., Jayne, J. T., Kolb, C. E., and Worsnop, D. R.: Kinetic model for reaction of ClONO<sub>2</sub> with H<sub>2</sub>O and HCl and HOCl with HCl in sulfuric acid solutions, *Journal of Geophysical Research*, 106, 24 259–24 274, 2001.
- Shindell, D. T., Schmidt, G. A., Miller, R. L., and Rind, D.: Northern Hemisphere winter climate response to greenhouse gas, ozone, solar and volcanic forcing, *Journal of Geophysical Research*, 106, 7193–7210, 2001.
- 5 Sinnhuber, B. M., Sheode, N., Sinnhuber, M., Chipperfield, M. P., and Feng, W.: The contribution of anthropogenic bromine emissions to past stratospheric ozone trends: A modelling study, *Atmospheric Chemistry and Physics*, 9, 2863–2871, <https://doi.org/10.5194/acp-9-2863-2009>, 2009.
- Solanki, S. K., Krivova, N. A., and Haigh, J. D.: Solar Irradiance Variability and Climate, *Annual Review of Astronomy and Astrophysics*, 51, <https://doi.org/10.1146/annurev-astro-082812-141007>, 2013.
- 10 Solomon, S., Haskins, J., Ivy, D. J., and Min, F.: Fundamental differences between Arctic and Antarctic ozone depletion, *Proceedings of the National Academy of Sciences*, 111, 6220–6225, <https://doi.org/10.1073/pnas.1319307111>, 2014.
- Solomon, S., Kinnison, D., Bandoro, J., and Garcia, R.: Simulation of polar ozone depletion : An update, *Journal of Geophysical Research : Atmospheres*, 120, 7958–7974, <https://doi.org/10.1002/2015JD023365>, 2015.
- Steele, H. M. and Hamill, P.: Effects of Temperature and Humidity on the Acid-Water Droplets in the Stratosphere, *Journal of Aerosol*  
15 *Science*, 12, 517–528, 1981.
- Steinbrecht, W., Claude, H., and Winkler, P.: Enhanced upper stratospheric ozone: Sign of recovery or solar cycle effect?, *Journal of Geophysical Research D: Atmospheres*, 109, 1–6, <https://doi.org/10.1029/2004JD004948>, 2004.
- Telford, P. J., Abraham, N. L., Archibald, A. T., Braesicke, P., Dalvi, M., Morgenstern, O., O’Connor, F. M., Richards, N. A. D., and Pyle, J. A.: Implementation of the Fast-JX Photolysis scheme into the UKCA component of the MetUM chemistry climate model, *Geoscientific*  
20 *Model Development*, 5, 3217–3260, <https://doi.org/10.5194/gmd-5-3217-2012>, 2012.
- Thompson, D. W. J. and Solomon, S.: Interpretation of Recent Southern Hemisphere Climate Change, *Science*, 296, 895–899, 2002.
- Thompson, D. W. J., Solomon, S., Kushner, P. J., England, M. H., Grise, K. M., and Karoly, D. J.: Signatures of the Antarctic ozone hole in Southern Hemisphere surface climate change, *Nature Geoscience*, 4, 741–749, <https://doi.org/10.1038/ngeo1296>, 2011.
- Tourpali, K., Schuurmans, C. J. E., van Dorland, R., Steil, B., and Brühl, C.: Stratospheric and tropospheric response to enhanced solar UV  
25 radiation: A model study, *Geophysical Research Letters*, 30, 1231, <https://doi.org/10.1029/2002GL016650>, <http://doi.wiley.com/10.1029/2002GL016650>, 2003.
- Tourpali, K., Zerefos, C. S., Balis, D. S., and Bais, A. F.: The 11-year solar cycle in stratospheric ozone: Comparison between Umkehr and SBUVv8 and effects on surface erythemal irradiance, *Journal of Geophysical Research Atmospheres*, 112, 1–8, <https://doi.org/10.1029/2006JD007760>, 2007.
- 30 van Vuuren, D. P., Edmonds, J., Kainuma, M., Riahi, K., Thomson, A., Hibbard, K., Hurtt, G. C., Kram, T., Krey, V., Lamarque, J.-F., Masui, T., Meinshausen, M., Nakicenovic, N., Smith, S. J., and Rose, S. K.: The representative concentration pathways: an overview, *Climatic Change*, 109, 5–31, <https://doi.org/10.1007/s10584-011-0148-z>, 2011.
- Walters, D., Baran, A., Boutle, I., Brooks, M., Earnshaw, P., Edwards, J., Furtado, K., Hill, P., Lock, A., Manners, J., Morcrette, C., Mulcahy, J., Sanchez, C., Smith, C., Stratton, R., Tennant, W., Tomassini, L., Van Weverberg, K., Vosper, S., Willett, M., Browse, J., Bushell, A.,  
35 Dalvi, M., Essery, R., Gedney, N., Hardiman, S., Johnson, B., Johnson, C., Jones, A., Mann, G., Milton, S., Rumbold, H., Sellar, A., Ujiie, M., Whittall, M., Williams, K., and Zerroukat, M.: The Met Office Unified Model Global Atmosphere 7.0/7.1 and JULES Global Land 7.0 configuration, *Geoscientific Model Development Discussions*, <https://doi.org/10.5194/gmd-2017-291>, 2017.

- Wegner, T., Kinnison, D. E., Garcia, R. R., Solomon, S., and Journal, M.: Simulation of polar stratospheric clouds in the specified dynamics version of the whole atmosphere community climate model, *Journal of Geophysical Research: Atmospheres*, 118, 1–12, <https://doi.org/10.1002/jgrd.50415>, 2013.
- Wild, O., Zhu, X., and Prather, J.: Fast-J: accurate simulation of the in- and below cloud photolysis in tropospheric chemical models, *Journal of Atmospheric Chemistry*, 37, 245–282, 2000.
- Wilson, D. R. and Ballard, S. P.: A microphysically based precipitation scheme for the UK Meteorological Office Unified Model, *Quarterly Journal of the Royal Meteorological Society*, 125, 1607–1636, <https://doi.org/10.1256/smsqj.55706>, 1999.
- WMO: Scientific Assessment of Ozone Depletion: 2010, Tech. Rep. 52, World Meteorological Organization - Report No. 52, Geneva, Switzerland, 2011.
- 10 Yang, X., Abraham, N. L., Archibald, A. T., Braesicke, P., Keeble, J., Telford, P. J., Warwick, N. J., and Pyle, J. A.: How sensitive is the recovery of stratospheric ozone to changes in concentrations of very short-lived bromocarbons?, *Atmospheric Chemistry and Physics*, 14, 10431–10438, <https://doi.org/10.5194/acp-14-10431-2014>, 2014.
- Yin, J. H.: A consistent poleward shift of the storm tracks in simulations of 21st century climate, *Geophysical Research Letters*, 32, 1–4, <https://doi.org/10.1029/2005GL023684>, 2005.
- 15 Zerefos, C. S., Tourpali, K., Bojkov, B. R., Balis, D. S., and Isaksen, I. S. A.: Solar activity-total column ozone relationships : Observations and model studies with heterogeneous chemistry Abstract . In the present paper we examine the effect of long-term solar variability on, *Journal of Geophysical Research: Atmospheres*, 102, 1561–1569, <https://doi.org/10.1029/96JD02395>, 1997.
- Zhang, R., Leu, M.-T., and Keyser, L. F.: Heterogeneous Reactions of ClONO<sub>2</sub>, HCl, and HOCl on Liquid Sulfuric Acid Surfaces, *Journal of Physical Chemistry*, 98, 13 583–13 574, <https://doi.org/10.1021/j100102a022>, 1994.
- 20 Zhang, R., Leu, M.-T., and Keyser, L. F.: Hydrolysis of N<sub>2</sub>O<sub>5</sub> and ClONO<sub>2</sub> on the H<sub>2</sub>SO<sub>4</sub>/HNO<sub>3</sub>/H<sub>2</sub>O ternary solutions under stratospheric conditions, *Geophysical Research Letters*, 22, 1493–1496, 1995.
